# Supplementary material for: Bifunctional 64Cu-labelled macrobicyclic cage amine isothiocyanates for immuno-positron emission tomography
Source: Royal Society of Chemistry journal article supplement (doi:10.1039/c4dt02983f), 2014-10-17
Supplement: c4dt02983f1.pdf [file c4dt02983f1.pdf]

## Bifunctional $^{64}\text{Cu}$ -labelled macrobicyclic cage amine isothiocyanates for immuno-positron emission tomography

Brett M. Paterson,<sup>\*a</sup> Gojko Buncic,<sup>a</sup> Lachlan E. McInnes,<sup>a</sup> Peter Roselt,<sup>b</sup> Carleen Cullinane,<sup>b,c</sup> David S. Binns,<sup>d</sup> Charmaine M. Jeffery,<sup>e</sup> Roger I. Price,<sup>e,f</sup> Rodney J. Hicks<sup>\*c,d</sup> and Paul S. Donnelly<sup>\*a</sup>

<sup>a</sup> School of Chemistry and Bio21 Molecular Science and Biotechnology Institute, The University of Melbourne, Parkville, VIC, Australia. Email: [brettp@unimelb.edu.au](mailto:brettp@unimelb.edu.au); [pauld@unimelb.edu.au](mailto:pauld@unimelb.edu.au)

<sup>b</sup> Research Division, Peter MacCallum Cancer Centre, St Andrews Pl, East Melbourne, VIC, Australia.

<sup>c</sup> The Sir Peter MacCallum Department of Oncology, The University of Melbourne, Parkville, VIC, Australia. Email: [Rod.Hicks@petermac.org](mailto:Rod.Hicks@petermac.org)

<sup>d</sup> Centre for Cancer Imaging, Peter MacCallum Cancer Centre, St Andrews Pl, East Melbourne, VIC, Australia

<sup>e</sup> Department of Medical Technology and Physics, Sir Charles Gairdner Hospital, Nedlands, WA, Australia.

<sup>f</sup> School of Physics, The University of Western Australia, Nedlands, WA, Australia.

**\*To whom correspondence should be addressed.**

|                                                                                                                                                                                                                                                                        |   |
|------------------------------------------------------------------------------------------------------------------------------------------------------------------------------------------------------------------------------------------------------------------------|---|
| Figure S1: $^1\text{H}$ NMR spectrum of $[\text{Mg}(\text{CH}_3)(p\text{-NCS-Ph})\text{sar}](\text{CF}_3\text{SO}_3)_2$ .....                                                                                                                                          | 2 |
| Figure S2: $^1\text{H}$ NMR spectrum of $[\text{Mg}(\text{CH}_3)(\text{NCS-OEG})\text{sar}](\text{CF}_3\text{SO}_3)_2$ .....                                                                                                                                           | 2 |
| Figure S3: Structure of the water soluble bis(thiosemicarbazone) $\text{Na}[\text{H}_2\text{L}]$ .....                                                                                                                                                                 | 2 |
| Figure S4: Section of interest of an absorbance spectrum (around 280 nm) of a solution containing Trastuzumab (25 $\mu\text{L}$ ) in 50 mM MOPS buffer (3000 $\mu\text{L}$ , pH 7.1). .....                                                                            | 3 |
| Figure S5: Section of interest of overlaid absorbance spectra (around 280 nm) of solutions formed as a result of titration of $(\text{CH}_3)(p\text{-NCS-Ph})\text{sar}$ -trastuzumab (4 $\mu\text{L}$ each aliquot) into 50 mM MOPS buffer (918 $\mu\text{L}$ ) ..... | 3 |
| Figure S6: Section of interest of overlaid absorbance spectra (around 460 nm) of the solutions used in determination of ligand to antibody ratio. ....                                                                                                                 | 4 |

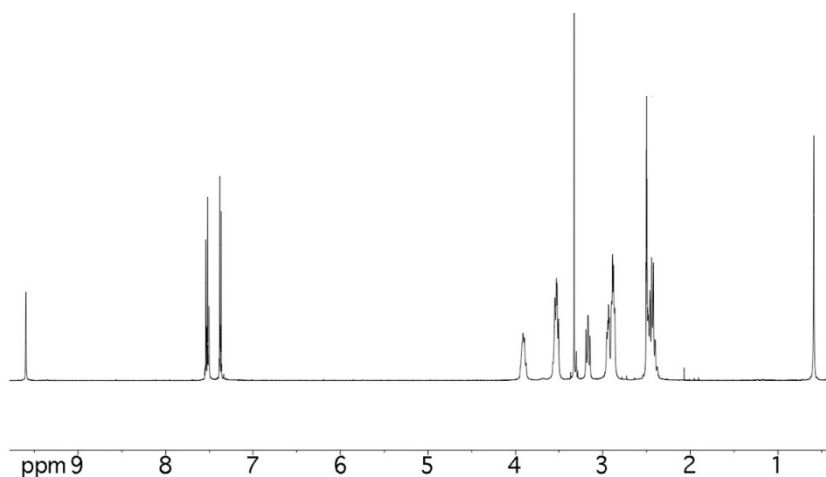

**Figure S1:**  $^1\text{H}$  NMR spectrum of  $[\text{Mg}(\text{CH}_3)(p\text{-NCS-Ph})\text{sar}](\text{CF}_3\text{SO}_3)_2$

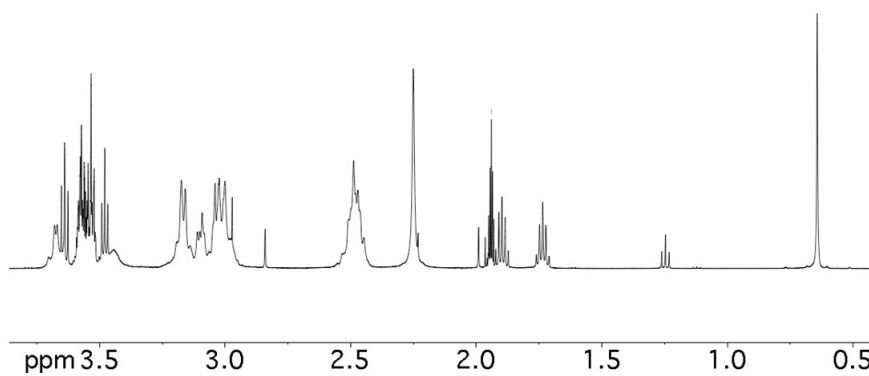

**Figure S2:**  $^1\text{H}$  NMR spectrum of  $[\text{Mg}(\text{CH}_3)(\text{NCS-OEG})\text{sar}](\text{CF}_3\text{SO}_3)_2$

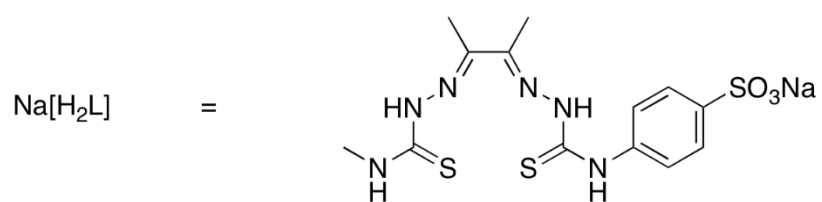

**Figure S3:** Structure of the water soluble bis(thiosemicarbazone)  $\text{Na}[\text{H}_2\text{L}]$

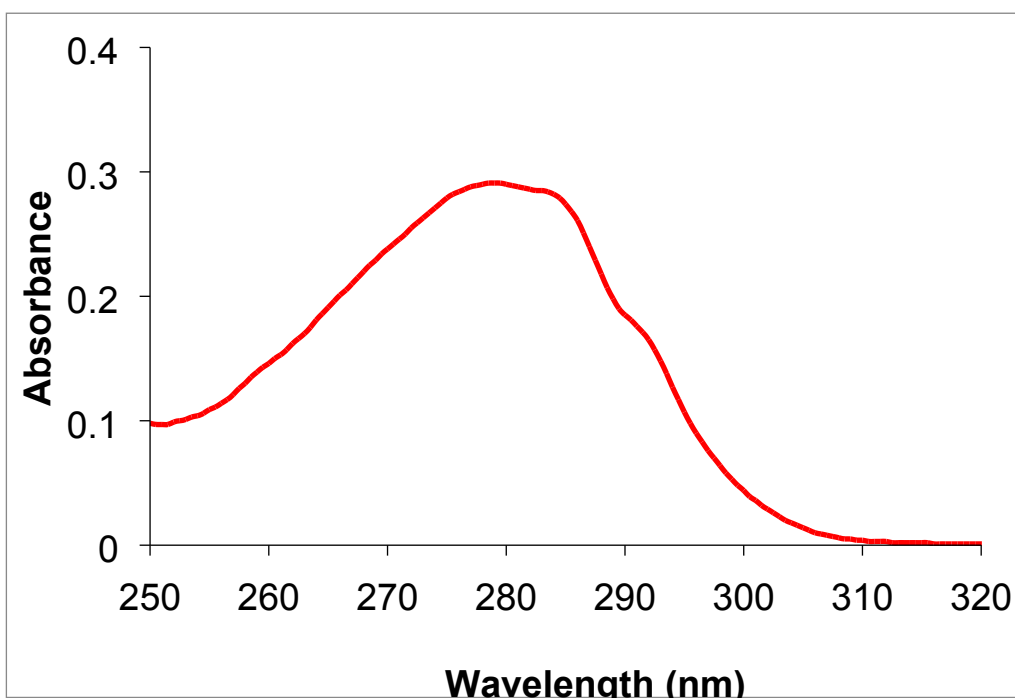

**Figure S4:** Section of interest of an absorbance spectrum (around 280 nm) of a solution containing Trastuzumab (25  $\mu$ L) in 50 mM MOPS buffer (3000  $\mu$ L, pH 7.1).

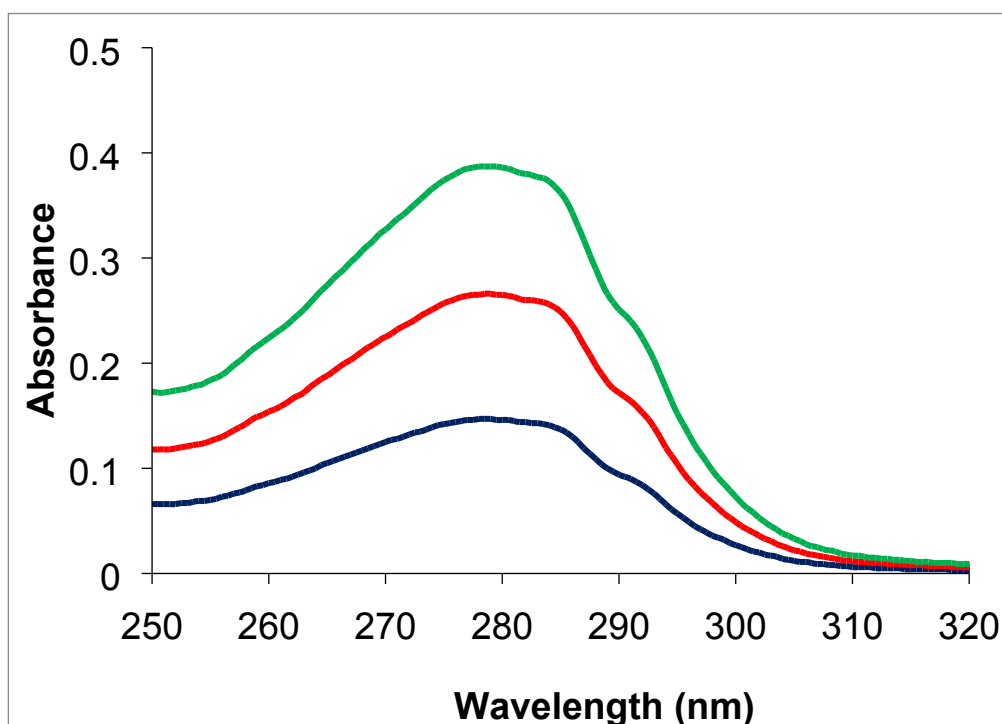

**Figure S5:** Section of interest of overlaid absorbance spectra (around 280 nm) of solutions formed as a result of titration of  $(\text{CH}_3)(p\text{-NCS-Ph})\text{sar-trastuzumab}$  (4  $\mu$ L each aliquot) into 50 mM MOPS buffer (918  $\mu$ L).

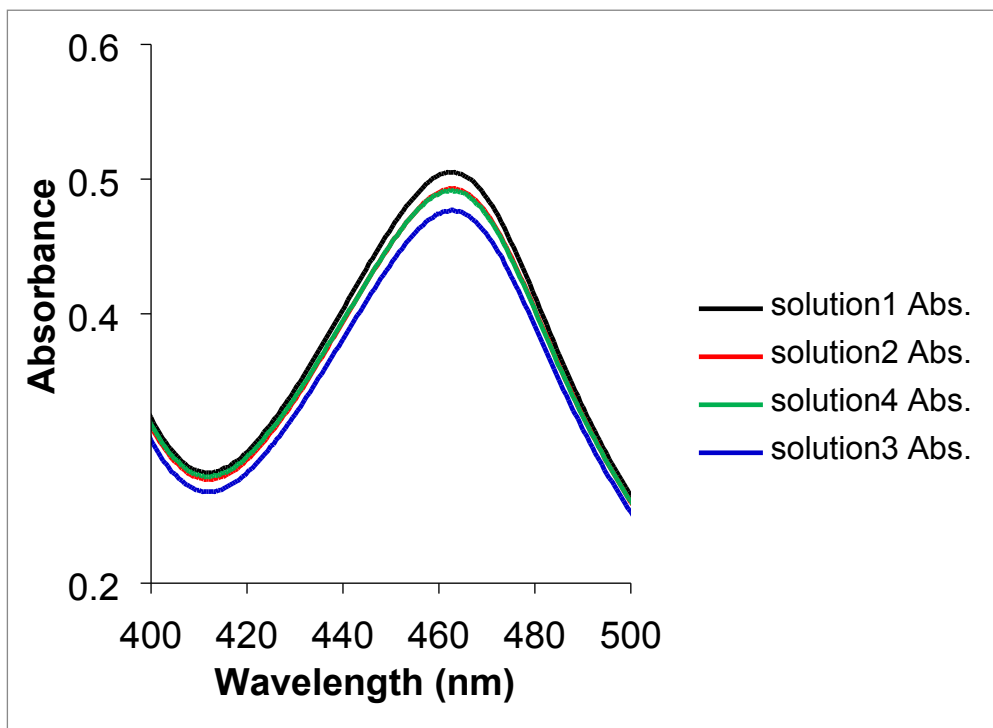

**Figure S6:** Section of interest of overlaid absorbance spectra (around 460 nm) of the solutions used in determination of ligand to antibody ratio.
